# Supplementary material
Source: ML conference proceedings conference paper supplement (https://proceedings.neurips.cc/paper_files/paper/2020/hash/24bcb4d0caa4120575bb45c8a156b651-Abstract.html)
Supplement: Supplementary file [file 24bcb4d0caa4120575bb45c8a156b651-Supplemental.pdf]

---

# Learning to Approximate a Bregman Divergence: Supplementary Material

---

Anonymous Author(s)

Affiliation

Address

email

## 1 Appendix

2 In this appendix, we provide several additional results:

- 3 • Background mathematical concepts required for the proofs (A1)
- 4 • Proof of the approximation bound (A2)
- 5 • Proof of the Rademacher complexity bound (A3)
- 6 • Proof of the metric learning generalization error bound (A4)
- 7 • Discussion of the regression setting, including generalization error (A5)
- 8 • Discussion of the case where  $K < n$  (A6)
- 9 • Some additional details omitted from the discussion of the algorithms (A7)
- 10 • Additional experimental results, including results on regression and classification (A8)

### 11 A1 Covering number

12 This is a brief overview of covering numbers from [1]. Let  $(\Omega, \|\cdot\|)$  be a metric space and  $\Omega \subset \mathbb{U}$ .  
13 For any  $\epsilon > 0$ ,  $\mathbb{X}_\epsilon \subset \mathbb{U}$  is an  $\epsilon$ -covering of  $\Omega$  if:

$$\min_{\hat{\mathbf{x}} \in \mathbb{X}_\epsilon} \|\mathbf{x} - \hat{\mathbf{x}}\| \leq \epsilon \quad \forall \mathbf{x} \in \Omega.$$

14 The covering number  $\mathcal{N}(\Omega, \epsilon, \|\cdot\|)$  is defined as the minimum cardinality of an  $\epsilon$ -covering of  $\Omega$ . By  
15 volumetric arguments, the covering number of the norm ball of radius  $R$  in  $d$ -dimension  $\mathcal{B}(R)$  is  
16 bounded as below:

$$\left(\frac{R}{\epsilon}\right)^d \leq \mathcal{N}(\mathcal{B}(R), \epsilon, \|\cdot\|) \leq \left(\frac{2R}{\epsilon} + 1\right)^d.$$

17 In this paper we only consider the  $\|\cdot\|_\infty$  on the input space. We construct a covering set by dividing  
18 the space into hyper-cubes of side length  $2\epsilon$  as depicted in Figure 1. This construction provides us a  
19 covering set of size  $\mathcal{N}(\mathcal{B}(R), \epsilon, \|\cdot\|_\infty) \leq \lceil R/\epsilon \rceil^d$ .

### 20 A2 Approximation Guarantees

21 Before proceeding with the proof we state a useful lemma.

22 **Lemma 1.** [6] For any two vectors  $\mathbf{r}_1, \mathbf{r}_2 \in \mathbb{R}^d$ ,

23

$$\sup_{\|\mathbf{u}\|_\infty \leq \rho} \langle \mathbf{r}_1 - \mathbf{r}_2, \mathbf{u} \rangle \leq \delta \iff \|\mathbf{r}_1 - \mathbf{r}_2\|_1 \leq \delta/\rho.$$

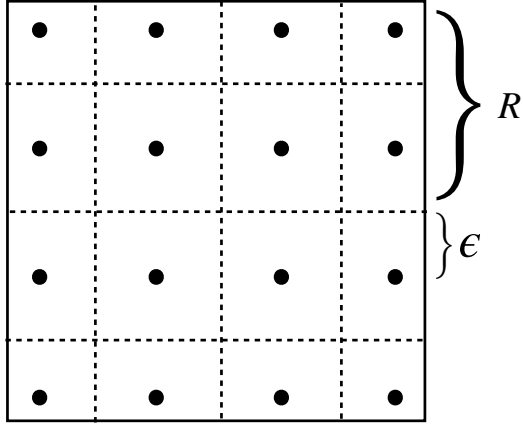

Figure 1: Sketch of a 2-dimensional hyper-cube of radius  $R$ , covered by  $\infty$ -norm balls of radius  $\epsilon$ .

24 **Proof of Theorem 1.**

25 Let  $\mathbb{X}_\epsilon = \{\hat{\mathbf{x}}_1, \dots, \hat{\mathbf{x}}_K\}$  be an  $\epsilon$ -cover for  $\mathcal{B}(R)$  as constructed in A1. We have:

$$\epsilon = \frac{R}{\lfloor K^{1/d} \rfloor} \leq 2RK^{-1/d}.$$

26 Let  $\hat{\mathbf{x}} = \arg \min_{\hat{\mathbf{x}}_i \in \mathbb{X}_\epsilon} \|\mathbf{x} - \hat{\mathbf{x}}_i\|_\infty$ . We know  $\|\mathbf{x} - \hat{\mathbf{x}}\|_\infty \leq \epsilon$  due to construction of  $\mathbb{X}_\epsilon$ . Consider  
 27 the piecewise linear function,  $h : \mathbb{R}^d \rightarrow \mathbb{R}$ , defined as follows:

$$h(\mathbf{x}) \triangleq \max_i \phi(\hat{\mathbf{x}}_i) + \langle \nabla \phi(\hat{\mathbf{x}}_i), \mathbf{x} - \hat{\mathbf{x}}_i \rangle. \quad (1)$$

28 We have:

$$\begin{aligned} 0 &\leq \phi(\mathbf{x}) - h(\mathbf{x}) \\ &\leq \phi(\mathbf{x}) - \phi(\hat{\mathbf{x}}) - \langle \nabla \phi(\hat{\mathbf{x}}), \mathbf{x} - \hat{\mathbf{x}} \rangle \\ &\leq \langle \nabla \phi(\mathbf{x}) - \nabla \phi(\hat{\mathbf{x}}), \mathbf{x} - \hat{\mathbf{x}} \rangle \\ &\leq \|\nabla \phi(\mathbf{x}) - \nabla \phi(\hat{\mathbf{x}})\|_1 \|\mathbf{x} - \hat{\mathbf{x}}\|_\infty \\ &\leq \beta \|\mathbf{x} - \hat{\mathbf{x}}\|_\infty^2 \leq \beta \epsilon^2 = 4\beta R^2 K^{-2/d}. \end{aligned}$$

29 Therefore (9) in the main paper is shown. For proving (10) consider covering points  $\hat{\mathbf{x}}_i$  in a  $\delta$ -ball  
 30 around  $\mathbf{x}$ .

$$\begin{aligned} &\langle \nabla \phi(\mathbf{x}) - \nabla h(\mathbf{x}), \mathbf{x} - \hat{\mathbf{x}}_i \rangle \\ &= \langle \nabla \phi(\mathbf{x}) - \nabla \phi(\hat{\mathbf{x}}_i), \mathbf{x} - \hat{\mathbf{x}}_i \rangle \\ &+ \phi(\hat{\mathbf{x}}_i) + \langle \nabla \phi(\hat{\mathbf{x}}_i), \mathbf{x} - \hat{\mathbf{x}}_i \rangle \quad * (\langle h(\mathbf{x}) \rangle) \\ &- h(\hat{\mathbf{x}}_i) - \langle \nabla h(\mathbf{x}), \mathbf{x} - \hat{\mathbf{x}}_i \rangle \quad ** (\langle -h(\mathbf{x}) \rangle) \\ &\leq \|\nabla \phi(\mathbf{x}) - \nabla \phi(\hat{\mathbf{x}}_i)\|_1 \|\mathbf{x} - \hat{\mathbf{x}}_i\|_\infty \\ &\leq \beta \|\mathbf{x} - \hat{\mathbf{x}}_i\|_\infty^2 \leq \beta \delta^2. \end{aligned} \quad (2)$$

31 \* is true due to the way  $h(\mathbf{x})$  is defined in (1). \*\* is true due to convexity. By a convex combination  
 32 of inequalities in (2) we get:

$$\langle \nabla \phi(\mathbf{x}) - \nabla h(\mathbf{x}), \mathbf{x} - \sum_i \alpha_i \hat{\mathbf{x}}_i \rangle \leq \beta \delta^2. \quad (3)$$

33 Next we will prove  $\mathbf{x} - \sum_i \alpha_i \hat{\mathbf{x}}_i$  can represent any vector  $\mathbf{r}$  of size  $\|\mathbf{r}\|_\infty \leq \delta - 2\epsilon$ . From there by  
 34 using Lemma 1 and choosing  $\delta = 4\epsilon$  we'll get

$$\|\nabla \phi(\mathbf{x}) - \nabla h(\mathbf{x})\|_1 \leq \beta \delta^2 / (\delta - 2\epsilon) \leq 16\beta R^2 K^{-1/d}.$$

35 If  $\delta \geq 2\epsilon$  and  $\mathbf{x}$  is no closer than  $\delta$  to the boundaries of  $\mathcal{B}(R)$ , we can consider hyper-cubes  $\mathcal{B}(\epsilon)$   
 36 fitted to each corner of  $\mathcal{B}(\delta)$  centered at  $\mathbf{x}$  as in the 2-dimensional case depicted by Figure 2. There  
 37 has to be covering points in each of these  $\epsilon$ -hyper-cubes, otherwise their center is further away from  
 38 all covering points by more than  $\epsilon$ . As depicted by Figure 2 the convex hull of such covering points  
 39 includes a  $(\delta - 2\epsilon)$ -hyper-cube centered at  $\mathbf{x}$ . Therefore any vector of size  $(\delta - 2\epsilon)$  can be represented  
 by  $(\mathbf{x} - \sum_i \alpha_i \hat{\mathbf{x}}_i)$ .

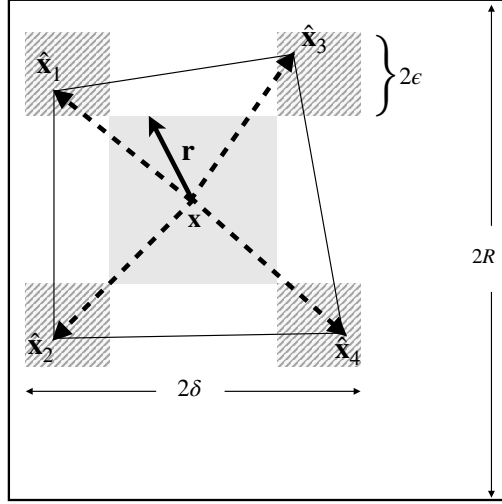

Figure 2: The 2-dimensional sketch of the input space  $\mathcal{B}(R)$  along with  $\mathcal{B}(\delta)$  centered at  $\mathbf{x}$ . Four dashed vectors represent  $\mathbf{x} - \hat{\mathbf{x}}_k$ . Using a convex combination of these vectors we can represent any vector  $\mathbf{r}$  (solid vector) of size  $\|\mathbf{r}\|_\infty = \delta - 2\epsilon$ .

40

41 The proof of (11) in the main paper is done by combining the approximation error of the gradient and  
 42 the convex function as follows:

$$\begin{aligned}
 D_\phi(\mathbf{x}, \mathbf{x}') - D_h(\mathbf{x}, \mathbf{x}') &= \phi(\mathbf{x}) - \phi(\mathbf{x}') - \langle \nabla \phi(\mathbf{x}'), \mathbf{x} - \mathbf{x}' \rangle \\
 &\quad - h(\mathbf{x}) + h(\mathbf{x}') + \langle \nabla h(\mathbf{x}'), \mathbf{x} - \mathbf{x}' \rangle \\
 &\leq \phi(\mathbf{x}) - h(\mathbf{x}) \\
 &\quad + \langle \nabla h(\mathbf{x}') - \nabla \phi(\mathbf{x}'), \mathbf{x} - \mathbf{x}' \rangle \\
 &\leq |\phi(\mathbf{x}) - h(\mathbf{x})| \\
 &\quad + \|\nabla \phi(\mathbf{x}) - \nabla h(\mathbf{x})\|_1 \|\mathbf{x} - \mathbf{x}'\|_\infty \\
 &\leq 36\beta R^2 K^{-1/d}.
 \end{aligned}$$

43 The other side of the inequality can be shown similarly.

#### 44 A3 Rademacher complexity of piecewise linear Bregman divergences

45 The Rademacher complexity  $R_m(\mathcal{F})$  of a function class  $\mathcal{F}$  is defined as the expected maximum  
 46 correlation of a function class with binary noise. Bounding the Rademacher complexity of a function  
 47 class provides us with a measure of how complex the class is. This measure is used in computing  
 48 probably approximately correct (PAC) bounds for learning tasks such as classification, regression,  
 49 and ranking. Let

$$\mathcal{F}_{P,L} \triangleq \{h : \mathbb{R}^d \rightarrow \mathbb{R} \mid h(\mathbf{x}) = \max_{k \in [K]} \mathbf{a}_k^T \mathbf{x} + b_k, \|\mathbf{a}_k\|_1 \leq L\}$$

50 be the class of  $L$ -Lipschitz max-affine functions. Also let

$$\mathcal{D}_{P,L} \triangleq \{h(\mathbf{x}) - h(\mathbf{x}') - \nabla h(\mathbf{x}')^T (\mathbf{x} - \mathbf{x}') \mid h \in \mathcal{F}_{P,L}\}$$

51 be the class of Bregman divergences parameterized by a max-affine functions.

52

53 **Lemma 2.** *The Radamacher complexity of Bregman divergences parameterized by a max-affine*  
 54 *function  $R_m(\mathcal{D}_{P,L}) \leq 4KLR\sqrt{(2\ln(2d+2))/m}$ .*

55 Proof. Define:  $p(\mathbf{x}) \triangleq \arg \max_k \mathbf{a}_k^T \mathbf{x} + b_k$

$$\begin{aligned} \mathcal{D}_{P,L} &= \{h(\mathbf{x}) - h(\mathbf{x}') - \nabla h(\mathbf{x}')^T (\mathbf{x} - \mathbf{x}') \mid h \in \mathcal{F}_{P,L}\} \\ &= \{\mathbf{a}_{p(\mathbf{x})}^T \mathbf{x} + b_{p(\mathbf{x})} - \mathbf{a}_{p(\mathbf{x}')}^T \mathbf{x} - b_{p(\mathbf{x}')} \mid \|\mathbf{a}_i\|_1 \leq L\} \\ &= \{\mathbf{a}_{p(\mathbf{x})}^T \mathbf{x} + c_{p(\mathbf{x})} - \mathbf{a}_{p(\mathbf{x}')}^T \mathbf{x} - c_{p(\mathbf{x}')} \\ &\quad \mid \|\mathbf{a}_i\|_1 \leq L, c_i = b_i - b_{p(0)} + LR\}. \end{aligned}$$

56 Note that  $|c_i| \leq LR$ :

$$-c_i = b_{p(0)} - b_i - LR = \max_k b_k - b_i - LR \geq -LR.$$

57 For the other side, consider  $\mathbf{x}$  such that  $h(\mathbf{x}) = \mathbf{a}_i^T \mathbf{x} + b_i$ . If no such  $\mathbf{x}$  exists, we can discard the  $i^{\text{th}}$   
 58 hyper-plane. Therefore:

$$\begin{aligned} -c_i &= b_{p(0)} - b_i - LR = \max_k b_k - b_i - LR \\ &= h(0) - h(\mathbf{x}) + \mathbf{a}_i^T \mathbf{x} - LR \\ &\leq L\|0 - \mathbf{x}\|_\infty + \|\mathbf{a}_i\|_1 \|\mathbf{x}\|_\infty - LR \leq LR. \end{aligned}$$

59 Now we are ready to compute the Radamacher complexity:

$$\begin{aligned} R_m(\mathcal{D}_{P,L}) &= \frac{1}{m} \mathbb{E}_\sigma \sup \sum_{i=1}^m \sigma_i D_h(\mathbf{x}_i, \mathbf{x}'_i) \\ &= \frac{1}{m} \mathbb{E}_\sigma \sup_{\substack{\forall k \|\mathbf{a}_k\|_1 \leq L \\ \forall k \|c_k\|_1 \leq LR}} \sum_{i=1}^m \sigma_i (\mathbf{a}_{p(\mathbf{x}_i)}^T \mathbf{x}_i + c_{p(\mathbf{x}_i)} \\ &\quad - \mathbf{a}_{p(\mathbf{x}'_i)}^T \mathbf{x}'_i - c_{p(\mathbf{x}'_i)}) \\ &\leq \frac{2}{m} \mathbb{E}_\sigma \sup_{\substack{\forall k \|\mathbf{a}_k\|_1 \leq L \\ \forall k \|c_k\|_1 \leq LR}} \sum_{i=1}^m \sum_{k=1}^K |\sigma_i (\mathbf{a}_k^T \mathbf{x}_i + c_k)| \\ &= \frac{2K}{m} \mathbb{E}_\sigma \sup_{\substack{\|\mathbf{a}_1\|_1 \leq L \\ \|c_1\|_1 \leq LR}} \sum_{i=1}^m \left| \sigma_i \begin{bmatrix} c_1/R \\ \mathbf{a}_1 \end{bmatrix}^T \begin{bmatrix} R \\ \mathbf{x}_i \end{bmatrix} \right|. \end{aligned}$$

60 The last expression is  $2K$  times the complexity of a Lipschitz linear function which is computed in  
 61 [9], Sec. 26.2. Therefore:

$$\begin{aligned} R_m(\mathcal{D}_{P,L}) &\leq 2K \left\| \begin{bmatrix} c_1/R \\ \mathbf{a}_1 \end{bmatrix} \right\|_1 \\ &\quad \times \sup_i \left\| \begin{bmatrix} R \\ \mathbf{x}_i \end{bmatrix} \right\|_\infty \sqrt{(2\ln(2d+2))/m} \\ &\leq 2K \times 2L \times R \times \sqrt{(2\ln(2d+2))/m}. \end{aligned}$$

62

### 63 A4 PAC bounds for piecewise Bregman divergence metric learning

64 In this section we use the Rademacher complexity bounds derived in section A3 along with ap-  
 65 proximation guarantees of section A2 to provide standard generalization bounds for empirical risk  
 66 minimization under our divergence learning framework.

### 67 Proof of Theorem 2

68 The proof is very similar to that of Radamacher complexity bounds for soft-SVM given in [9]. First  
 69 from Theorem 26.12 in [9] for a  $\rho$ -Lipschitz loss function  $L(f, z) \leq M$  with probability of at least  
 70  $1 - \delta$  we have for all  $f \in \mathcal{F}$ :

$$L_\mu(f) \leq L_{S_m}(f) + 2\rho R_m(\mathcal{F}) + M\sqrt{(2\ln(2/\delta))/m}.$$

71 Now note that the hinge loss is 1-Lipschitz, bounded by 1. By substituting  $\mathcal{F} = \mathcal{D}_{P,L}$ ,  $f = h_m$  and  
 72  $L = L^{hinge}$  we get:

$$L_{\mu}^{hinge}(D_{h_m}) \leq L_{S_m}^{hinge}(D_{h_m}) + 4R_m(\mathcal{D}_{P,L}) + \sqrt{(2 \ln(2/\delta))/m} \quad w.p. \geq 1 - \delta. \quad (4)$$

73 Since we are also learning the Lipschitz constant  $L$ , for having a generalization bound we should  
 74 express a uniform result for all  $L$ . We use the trick used in [9] for providing the union bound. To  
 75 proceed for any integer  $i$  take  $L_i = 2^i$  and take  $\delta_i = \delta/(2i^2)$ . Using (4) we have for any  $L \leq L_i$ ,

$$L_{\mu}^{hinge}(D_{h_m}) \leq L_{S_m}^{hinge}(D_{h_m}) + 4R_m(\mathcal{D}_{P,L}) + \sqrt{(2 \ln(2/\delta_i))/m} \quad w.p. \geq 1 - \delta_i.$$

76 Applying the union bound and noting  $\sum_{i=1}^{\infty} \delta_i \leq \delta$  this holds for all  $i$  with probability at least  $1 - \delta$ .  
 77 Now take  $i = \lceil \log_2 L \rceil \leq \log_2 L + 1$  then  $\frac{2}{\delta_i} = \frac{(2i)^2}{\delta} \leq \frac{4 \log_2 L}{\delta}$ . Therefore:

$$L_{\mu}^{hinge}(D_{h_m}) \leq L_{S_m}^{hinge}(D_{h_m}) + 4R_m(\mathcal{D}_{P,L}) + (\sqrt{4 \ln(4 \log_2 L) + \ln(1/\delta)})/\sqrt{m},$$

78 with probability at least  $1 - \delta$ .

## 79 A5 Regression Setting

80 Next we consider the regression scenario, and discuss generalization bounds. Here we are interested  
 81 in the expected squared loss between the Bregman divergence obtained from the minimizer of the  
 82 regression loss (5) and the true divergence value, on unseen (test) data.

83 Suppose the function  $\ell_t$  consists of a pair of points from  $X$ , say  $\mathbf{x}_{i_t}$  and  $\mathbf{x}_{j_t}$ , and the  $y_t$  value is a  
 84 noisy version of the the target (ground truth) Bregman divergence between  $\mathbf{x}_{i_t}$  and  $\mathbf{x}_{j_t}$ . A standard  
 85 least squares loss function (with no regularization) would seek to solve

$$\min_{\phi \in \mathcal{F}} \sum_{t=1}^m (D_{\phi}(\mathbf{x}_{i_t}, \mathbf{x}_{j_t}) - y_t)^2.$$

86

87 Suppose we observe the data  $S_m = \{(\mathbf{x}_{i_t}, \mathbf{x}_{j_t}, y_t) | t \in [m]\}$ , where  $\mathbf{x} \in \mathbb{R}^d$  and  $y \in \mathbb{R}$ . We will  
 88 model the response random variable  $y$  as a Bregman divergence  $D_h(\mathbf{x}_i, \mathbf{x}_j)$  with  $h \in \mathcal{F}_{P,L}$ . Let  
 89  $h_m : \mathbb{R}^d \rightarrow \mathbb{R}$  be the empirical risk minimizer of

$$\min_{h \in \mathcal{F}_{P,L}} \frac{1}{m} \sum_{t=1}^m (D_h(\mathbf{x}_{i_t}, \mathbf{x}_{j_t}) - y_t)^2. \quad (5)$$

90 We know from (4) in the main paper that  $D_h(\mathbf{x}_i, \mathbf{x}_j) = b_i - b_j - \mathbf{a}_j^T(\mathbf{x}_i - \mathbf{x}_j)$ , subject to the  
 91 constraints given in Lemma 1 of the main paper. Therefore (5) can be solved as a quadratic program.

92 For the following generalization error bounds, we require that the training data be drawn iid. Note that  
 93 while there are known methods to relax these assumptions, as shown for Mahalanobis metric learning  
 94 in Bellet and Habrard [2], we assume here for simplicity that data is drawn iid<sup>1</sup> from  $\mathcal{X} \times \mathcal{X} \times \mathcal{Y}$   
 95 (and analogously for the relative distance case) with distribution  $\mu$ . Each instance,  $t \in [m]$ , is a triple,  
 96  $(\mathbf{x}_{i_t}, \mathbf{x}_{j_t}, y_t)$  drawn iid from  $\mu$ .

97 We have the following result:

98 **Theorem 1.** Consider  $S_m = \{(\mathbf{x}_{i_t}, \mathbf{x}_{j_t}, y_t), t \in [m]\} \sim \mu^m$ . Let  $\|\cdot\|_{\mu}^2 = \mathbb{E}[\|\cdot\|^2]$  and assume,

99 **A<sub>1</sub>:**  $\|\mathbf{x}\|_{\infty} \leq R$  and  $\sup |y_t - \mathbb{E}[y_t | \mathbf{x}_{i_t}, \mathbf{x}_{j_t}]| \leq \sigma$ , i.e. both the input and noise are bounded.

<sup>1</sup>In many cases this is justified. For instance, in estimating quality scores for items, one often has data corresponding to item-item comparisons [8]; for each item, the learner also observes contextual information. The feedback,  $y_t$  depends only on the pair  $(\mathbf{x}_{i_t}, \mathbf{x}_{j_t})$ , and as such is independent of other comparisons.

100 **A<sub>2</sub>**:  $E[y_i | \mathbf{x}_{i_t}, \mathbf{x}_{j_t}] = D_\phi(\mathbf{x}_{i_t}, \mathbf{x}_{j_t})$ , for a  $L$ -Lipschitz  $\beta$ -smooth function  $\phi$ .

101 The generalization error of the empirical risk minimizer  $D_{h_m}$  of the regression loss on  $S_m$ ,

$$\begin{aligned} \|D_{h_m} - y_t\|_\mu^2 &\leq \|D_{h_m} - y_t\|_{S_m}^2 \\ &\quad + 16MKLR\sqrt{2\ln(2d+2)/m} \\ &\quad + M^2\sqrt{\ln(1/\delta)/(2m)}, \end{aligned}$$

102 with probability at least  $1 - \delta$ . Furthermore,  $D_{h_m}$  converges to the ground truth Bregman divergence  
103  $D_\phi$  and the approximation error is bounded by

$$\begin{aligned} \|D_{h_m} - D_\phi\|_\mu^2 &\leq 36^2\beta^2R^4K^{-\frac{2}{d}} \\ &\quad + 16MKLR\sqrt{2\ln(2d+2)/m} \\ &\quad + M^2\sqrt{2\ln(2/\delta)/m}, \end{aligned}$$

104 where  $M = 4LR + \sigma$ . By choosing  $K = \lceil m^{\frac{d}{4+2d}} \rceil$  we get:  $\|D_{h_m} - D_\phi\|_\mu^2 = \mathcal{O}_p(m^{-\frac{1}{d+2}})$ .

105 Consider  $S_m \sim \mu^m$  be a set of  $m$  i.i.d data points. If  $|f(\mathbf{x}) - y| \leq M$  for all  $f \in \mathcal{F}$ ,  $\mathbf{x}$  and  $y$ , by a  
106 standard Rademacher generalization result:

$$\|f(\mathbf{x}) - y\|_\mu^2 \leq \|f(\mathbf{x}) - y\|_{S_m}^2 + 2MR_m(\mathcal{F}) + M^2\sqrt{\frac{\ln 1/\delta}{2m}},$$

107 with probability greater than  $1 - \delta$ . By substituting  $f = D_{h_m}$ , and  $\mathcal{F} = \mathcal{D}_{P,L}$  in the above we  
108 immediately get the first line of the proposition.

109 Further for the empirical risk minimizer  $f_m$  we have that for all  $\hat{f} \in \mathcal{F}$  that doesn't depend on the  
110 training data  $S_m$ :

$$\begin{aligned} \|f_m(\mathbf{x}) - f_*(\mathbf{x})\|_\mu^2 &\leq \|\hat{f}(\mathbf{x}) - f_*(\mathbf{x})\|_\mu^2 + 2MR_m(\mathcal{F}) \\ &\quad + 2M^2\sqrt{(\ln 2/\delta)/(2m)}, \end{aligned} \tag{6}$$

111 where  $f_*$  is  $\mathbb{E}[y|\mathbf{x}]$ . This comes from the fact that during training  $f_m$  was chosen and not  $\hat{f}$ . By  
112 substituting  $f_m = D_{h_m}$ ,  $f_* = D_\phi$ ,  $\hat{f} = D_h = \arg \inf_{h \in \mathcal{F}_{P,L}} \|D_\phi - D_h\|_\infty$  and  $\mathcal{F} = \mathcal{D}_{P,L}$  in (6)  
113 we have:

$$\begin{aligned} \|D_{h_m} - D_\phi\|_\mu^2 &\leq \|D_h - D_\phi\|_\mu^2 + 2MR_m(\mathcal{D}_{P,L}) \\ &\quad + 2M^2\sqrt{(\ln 2/\delta)/(2m)} \\ &\leq \|D_h - D_\phi\|_\infty^2 + 2MR_m(\mathcal{D}_{P,L}) \\ &\quad + 2M^2\sqrt{(\ln 2/\delta)/(2m)} \\ &\stackrel{Thm1}{\leq} (36R^2\beta K^{-\frac{1}{d}})^2 + 2MR_m(\mathcal{D}_{P,L}) \\ &\quad + 2M^2\sqrt{(\ln 2/\delta)/(2m)}. \end{aligned}$$

114 Now by substituting  $M = 4LR + \sigma$  and  $R_m(\mathcal{D}_{P,L})$  from the value given by Lemma 2 we get the  
115 proposition. The only thing left to prove is to show  $\forall h \in \mathcal{F}_{P,L}$  and  $\forall(\mathbf{x}, \mathbf{x}', y)$ ; the error is bounded,  
116 i.e.  $|y - D_h(\mathbf{x}, \mathbf{x}')| \leq M = 4LR + \sigma$ :

$$\begin{aligned} |y - D_h| &\leq |D_h - \mathbb{E}[y|\mathbf{x}, \mathbf{x}']| + |y - \mathbb{E}[y|\mathbf{x}, \mathbf{x}']| \\ &\leq |D_h - D_\phi| + \sigma \\ &\leq \max\{|D_h|, |D_\phi|\} + \sigma \\ &= |\phi(\mathbf{x}) - \phi(\mathbf{x}') - \nabla\phi(\mathbf{x}')^T(\mathbf{x} - \mathbf{x}')| + \sigma \\ &\leq 2\|\nabla\phi(\mathbf{x}')\|_1\|\mathbf{x} - \mathbf{x}'\|_\infty + \sigma = 4LR + \sigma. \end{aligned}$$

117 **A6 Farthest-point clustering and  $K < n$**

118 The algorithm given in the paper assumes that the number of hyperplanes  $K$  is equal to  $n$ ; this is  
119 mainly for simplicity of presentation. In practice we often want to have  $K < n$ . Here we discuss  
120 details of this approach, which we utilize in our experiments.

121 We apply a farthest-point clustering to the data first into  $K$  clusters, and then fix the assignments  
 122 of points to hyperplanes using this clustering. With this assignment in place, we can then apply a  
 123 minor modification to the PBDL algorithm to approximate the Bregman divergence. Farthest-point  
 124 clustering is a simple greedy algorithm for a K-center problem, where the objective is to divide the  
 125 space into  $K$  partitions such that the farthest distance between a data point and its closest partition  
 126 center  $\mu_i$  is minimized. This problem can be formulated as: given a set of  $n$  points  $x_1, \dots, x_n$  a  
 127 distance metric  $\|\cdot\|$  and a predefined partition size  $K$ , find a partition of data  $C_1, \dots, C_k$  and partition  
 128 centers  $\mu_1, \dots, \mu_K$  to minimize the maximum radius of the clusters:

$$\max_i \max_{x \in C_i} \|x - \mu_i\|.$$

129 The farthest point clustering introduced in [5] initially picks a random point  $x_{0_0}$  as the center of  
 130 the first cluster and adds it to the center set  $C$ . Then for iterations  $t = 2$  to  $k$  does the following:  
 131 at iteration  $t$ , computes the distance of all points from the center set  $d(x, C) = \min_{\mu \in C} \|x - \mu\|$ .  
 132 Add the point that has the largest distance from the center set (say  $x_{t_0}$ ) to the center set. Report  
 133  $x_{0_0}, \dots, x_{K_0}$  as the partition centers and assign each data point to its closest center.

134 Authors of [5] proved that farthest-point clustering is a 2-approximation algorithm (i.e. , it computes  
 135 a partition with maximum radius at most twice the optimum) for any metric. Therefore there is  
 136 a relation between the partition found by farthest-point clustering and covering set. Assume a set  
 137  $\{x_1, \dots, x_n\} \subset \Omega$  has a  $\epsilon$ -cover of size  $K$  over a metric  $\|\cdot\|$ . The partition found by farthest point  
 138 clustering of size  $K$  is a  $2\epsilon$ -cover for  $\{x_1, \dots, x_n\}$ .

### 139 A7 Parameterizing Bregman divergences by piecewise linear functions

140 We parameterize the Bregman divergence using max-affine functions  $h(x) = \max_{k=1, \dots, K} a_k^T x + b_k$ .  
 141 Using Lemma 1 from our paper with a predefined partition of the training data points  $x_1, \dots, x_n$   
 142 to  $C = \{C_1, \dots, C_K\}$  and defining the mapping  $p_i \doteq k$  given  $x_i \in C_k$ , we can write any pairwise  
 143 divergence on training set as

$$\begin{aligned} D_h(x_i, x_j) &= h(x_i) - h(x_j) - \nabla h(x_j)^T (x_i - x_j) \\ &= (a_{p_i}^T x_i + b_{p_i}) - (a_{p_j}^T x_j + b_{p_j}) - a_{p_j}^T (x_i - x_j) \\ &= b_{p_i} - b_{p_j} + (a_{p_i} - a_{p_j})^T x_i, \end{aligned}$$

144 which is linear in terms of the parameters  $a_k, b_k, k = 1, \dots, K$ . Therefore if the loss function

$$\mathcal{L}(\phi) = \sum_{i=1}^m c_i (D_\phi, X, y) + \lambda r(\phi),$$

145 is a convex function of pairwise divergences, it will be a convex loss in terms of parameters. Further-  
 146 more one needs to satisfy the constraints given by Lemma 1 in our paper to make sure  $h(x)$  remains  
 147 convex, i.e:

$$b_{p_j} + a_{p_j}^T x_j \geq b_k + a_k^T x_j, \quad j = 1, \dots, n, \quad k = 1, \dots, K,$$

148 which are linear inequality constraints. Therefore one can minimize the loss  $\mathcal{L}(\phi)$  as a convex  
 149 optimization problem.

### 150 A8 Additional Experimental Results

#### 151 Bregman divergence regression on synthetic data

152 In this section, we experiment with regression tasks on synthetic data. In particular, we show that if  
 153 data arises from a particular Bregman divergence, our method can discover the underlying divergence  
 154 whereas Mahalanobis metric learning methods cannot.

155 **Data:** We generate 100 synthetic data points in three ways: i) discrete probability distributions  
 156  $\{(p_1, p_2)\} | p_1 + p_2 = 1, p_1, p_2 \geq 0\}$  sampled from a Dirichlet probability distribution  $Dir([1]_{1 \times 2})$ ,  
 157 with a target value  $y$  computed as the KL divergence between pairs of distributions; ii) symmetric  
 158 2-2 matrices sampled from a Wishart distribution  $W_2([1]_{1 \times 2}, 10)$  with target value  $y$  computed  
 159 as the  $LogDet$  divergence between pairs; iii) data points are sampled uniformly from a unit-ball  
 160  $\mathcal{B}([0.6]_{1 \times 2}, 1)$  with target value  $y$  computed as the *Itakura-Saito* distance between pairs; iv) data  
 161 points are sampled uniformly from a unit-ball  $\mathcal{B}([0.6]_{1 \times 2}, 1)$  with target value  $y$  computed as the

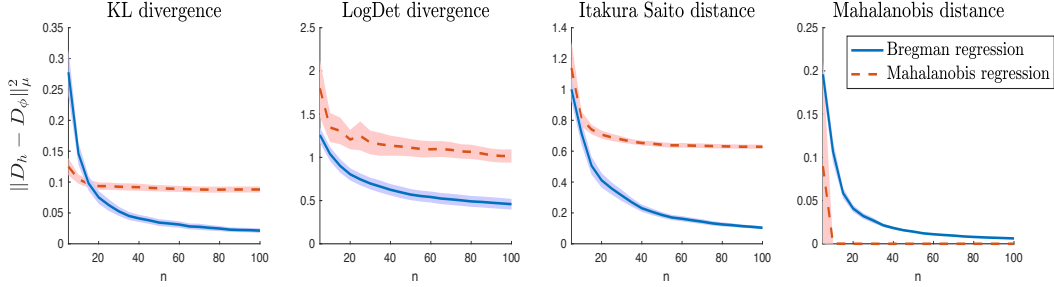

Figure 3: Regression with data from various Bregman divergences using PBDL and linear metric learning.

162 *Mahalanobis* distance between pairs. In each case we add Gaussian noise with stdev 0.05 to the ground  
 163 truth divergences. For training, we provide all pairs of an increasing set of points ( $\{(\mathbf{x}_i, \mathbf{x}_j), y_{i,j}\}$   
 164 for  $(i, j)$  in the power set of  $\{\mathbf{x}_1, \dots, \mathbf{x}_m\}$ ) and the target values  $y_i$  as noisy Bregman divergence of  
 165 those pairs. For testing, we generate 1000 data points from the same distribution and use noiseless  
 166 Bregman divergences as targets. Results are averaged over 50 runs.

167 **Details and observations:** For Bregman regression, we choose the Lipschitz constraint of PBDL for  
 168 regression to be  $\infty$  since the result was not sensitive to the choice of  $L$ . For *Mahalanobis regression*  
 169 we do gradient descent for optimizing the least-square fit of a general Mahalanobis metric with the  
 170 observed data which is done until convergence (as the problem is convex). We see from Figure 2  
 171 that Mahalanobis metric learning is not flexible enough to model the data coming from the first three  
 172 divergences, whereas the proposed divergence learning framework *PBDL* is shown to drastically  
 173 improve the fit and seems to be a consistent estimator as motivated earlier in Theorem 1.

#### 174 Nearest neighbor classification and additional data sets

175 We also present results on nearest neighbor classification and more data sets. Table 2 gives some  
 176 additional performance numbers; in particular, we have added two new data sets and shown results of  
 177 k-nearest neighbor classification.



Table 1: Learning Bregman divergences (PDBL) compared to existing linear and non-linear metric learning approaches on standard UCI benchmarks. PDBL performs first or second among these benchmarks in 22 of 30 comparisons, outperforming all of the other methods. Note that the top two results for each setting are indicated in bold.

| Data-set      | Algorithm      | Clustering        |                   | Ranking           |                   | KNN ACC                       |
|---------------|----------------|-------------------|-------------------|-------------------|-------------------|-------------------------------|
|               |                | Rand-Ind %        | Purity %          | AUC %             | Ave-P %           |                               |
| Iris          | PBDL           | <b>94.5 ± 0.8</b> | <b>95.6 ± 0.7</b> | <b>96.5 ± 0.4</b> | <b>93.5 ± 0.7</b> | 95.3 ± 0.7                    |
|               | ITML [3]       | <b>96.4 ± 0.8</b> | <b>97.0 ± 0.7</b> | <b>97.5 ± 0.3</b> | <b>95.3 ± 0.5</b> | <b>97.4 ± 0.6</b>             |
|               | LMNN [10]      | 90.0 ± 1.3        | 91.0 ± 1.3        | 94.3 ± 0.6        | 89.9 ± 0.8        | 96.1 ± 0.6                    |
|               | GB-LMNN [7]    | 88.7 ± 1.5        | 89.9 ± 1.5        | 94.0 ± 0.6        | 89.7 ± 0.8        | 95.6 ± 0.6                    |
|               | GMML [11]      | 93.8 ± 0.9        | 94.5 ± 0.9        | 95.7 ± 0.4        | 92.0 ± 0.6        | <b>96.6 ± 0.5</b>             |
|               | Kernel NCA [4] | 89.9 ± 1.3        | 90.3 ± 1.1        | 93.4 ± 0.6        | 88.3 ± 0.9        | 91.8 ± 1.4                    |
| Ionosphere    | PBDL           | 65.2 ± 1.9        | 77.2 ± 1.9        | 65.8 ± 0.8        | 71.1 ± 0.8        | 81.4 ± 1.0                    |
|               | ITML           | <b>72.2 ± 1.5</b> | <b>83.3 ± 1.2</b> | <b>71.5 ± 0.7</b> | <b>74.6 ± 0.6</b> | 85.0 ± 1.0                    |
|               | LMNN           | 58.3 ± 1.2        | 70.8 ± 1.2        | 62.2 ± 1.3        | 69.8 ± 0.9        | <b>87.1 ± 0.8</b>             |
|               | GB-LMNN        | 58.5 ± 0.9        | 70.9 ± 1.0        | 64.4 ± 1.3        | 71.2 ± 1.0        | <b>88.3 ± 0.9</b>             |
|               | GMML           | 61.7 ± 1.8        | 73.9 ± 1.7        | 66.3 ± 0.8        | 71.3 ± 0.6        | 82.3 ± 1.0                    |
|               | Kernel NCA     | <b>65.4 ± 1.7</b> | <b>77.7 ± 1.5</b> | <b>68.8 ± 1.1</b> | <b>72.0 ± 0.9</b> | 84.3 ± 1.0                    |
| Balance Scale | PBDL           | <b>84.4 ± 0.7</b> | <b>87.8 ± 0.5</b> | <b>86.0 ± 0.4</b> | <b>82.9 ± 0.5</b> | <b>91.4 ± 0.4</b>             |
|               | ITML           | 68.9 ± 0.9        | 77.5 ± 0.7        | <b>80.1 ± 0.7</b> | <b>74.3 ± 0.8</b> | <b>90.0 ± 0.6</b>             |
|               | LMNN           | 69.5 ± 1.8        | 77.0 ± 1.7        | 75.9 ± 1.3        | 70.0 ± 1.2        | 87.4 ± 0.5                    |
|               | GB-LMNN        | 71.4 ± 1.5        | 79.7 ± 1.4        | 78.1 ± 1.1        | 72.2 ± 1.0        | 87.8 ± 0.6                    |
|               | GMML           | <b>72.9 ± 0.8</b> | <b>80.2 ± 0.8</b> | 79.0 ± 0.4        | 72.8 ± 0.5        | 87.2 ± 0.6                    |
|               | Kernel NCA     | 65.3 ± 1.5        | 73.0 ± 1.6        | 68.7 ± 1.8        | 63.7 ± 1.9        | 79.9 ± 1.7                    |
| Wine          | PBDL           | <b>83.7 ± 2.9</b> | <b>85.0 ± 3.2</b> | <b>91.0 ± 0.9</b> | <b>86.7 ± 1.2</b> | <b>94.3 ± 0.9</b>             |
|               | ITML           | 82.8 ± 2.6        | 82.5 ± 3.1        | 89.1 ± 1.1        | 84.6 ± 1.4        | 93.8 ± 1.0                    |
|               | LMNN           | 70.0 ± 0.8        | 68.8 ± 1.2        | 82.4 ± 0.8        | 76.2 ± 1.1        | 91.7 ± 0.8                    |
|               | GB-LMNN        | 70.6 ± 0.9        | 69.3 ± 1.4        | 83.7 ± 0.1        | 78.5 ± 1.3        | 93.8 ± 0.8                    |
|               | GMML           | <b>83.2 ± 2.9</b> | <b>81.0 ± 3.2</b> | <b>91.0 ± 0.7</b> | <b>88.5 ± 0.7</b> | <b>96.5 ± 0.8</b>             |
|               | Kernel NCA     | 70.4 ± 1.3        | 71.3 ± 1.4        | 75.1 ± 0.9        | 67.7 ± 1.1        | 67.5 ± 1.2                    |
| Transfusion   | PBDL           | 57.9 ± 1.2        | 75.9 ± 0.7        | <b>54.9 ± 0.4</b> | <b>68.2 ± 0.6</b> | <b>75.7 ± 0.7<sub>s</sub></b> |
|               | ITML           | <b>60.2 ± 1.0</b> | 75.8 ± 0.7        | 54.2 ± 0.4        | 66.4 ± 0.7        | 74.5 ± 0.6                    |
|               | LMNN           | 59.4 ± 1.3        | <b>76.3 ± 0.6</b> | 54.0 ± 0.5        | 67.1 ± 0.7        | 75.0 ± 0.7                    |
|               | GB-LMNN        | 58.9 ± 1.2        | <b>76.3 ± 0.6</b> | <b>54.8 ± 0.6</b> | 67.2 ± 0.7        | 74.1 ± 0.7                    |
|               | GMML           | 59.3 ± 1.3        | <b>76.6 ± 0.7</b> | 54.0 ± 0.5        | <b>67.5 ± 0.7</b> | <b>76.1 ± 0.6</b>             |
|               | Kernel NCA     | <b>63.7 ± 0.7</b> | 76.2 ± 0.7        | 52.2 ± 0.8        | 65.7 ± 0.8        | 74.7 ± 0.8                    |
| Figure 1 data | PBDL           | <b>98.2 ± 0.3</b> | <b>98.6 ± 0.2</b> | <b>97.3 ± 0.3</b> | <b>95.6 ± 0.5</b> | <b>99.1 ± 0.2</b>             |
|               | ITML           | <b>76.2 ± 1.6</b> | <b>74.9 ± 2.5</b> | 90.5 ± 0.5        | 83.7 ± 0.5        | 99.0 ± 0.2                    |
|               | LMNN           | 73.4 ± 1.7        | 69.3 ± 2.6        | 90.4 ± 0.7        | 83.2 ± 0.7        | 98.8 ± 0.2                    |
|               | GB-LMNN        | 73.3 ± .5         | 71.3 ± 2.6        | 90.5 ± 0.8        | 83.4 ± 1.0        | <b>99.2 ± 0.2</b>             |
|               | GMML           | 73.9 ± 1.8        | 70.8 ± 2.8        | <b>91.4 ± 0.2</b> | <b>84.2 ± 0.3</b> | 98.9 ± 0.2                    |
|               | Kernel NCA     | 76.5 ± 2.4        | 73.9 ± 3.7        | 90.4 ± 0.6        | 83.9 ± 0.6        | 98.0 ± 0.5                    |

## 178 **References**

- 179 [1] Anthony, M. and Bartlett, P. L. (2009). *Neural network learning: Theoretical foundations.*  
180 cambridge university press.
- 181 [2] Bellet, A. and Habrard, A. (2015). Robustness and generalization for metric learning. *Neurocom-*  
182 *puting*, 151:259–267.
- 183 [3] Davis, J. V., Kulis, B., Jain, P., Sra, S., and Dhillon, I. S. (2007). Information-theoretic metric  
184 learning. In *Proceedings of the 24th international conference on Machine learning*, pages 209–216.  
185 ACM.
- 186 [4] Goldberger, J., Hinton, G. E., Roweis, S. T., and Salakhutdinov, R. R. (2005). Neighbourhood  
187 components analysis. In *Advances in neural information processing systems*, pages 513–520.
- 188 [5] Gonzalez, T. F. (1985). Clustering to minimize the maximum intercluster distance. *Theoretical*  
189 *Computer Science*, 38:293–306.
- 190 [6] Hölder, O. (1889). Ueber einen mittelwerthabsatz. *Nachrichten von der Königl. Gesellschaft der*  
191 *Wissenschaften und der Georg-Augusts-Universität zu Göttingen*, 1889:38–47.
- 192 [7] Kedem, D., Tyree, S., Sha, F., Lanckriet, G. R., and Weinberger, K. Q. (2012). Non-linear metric  
193 learning. In *Advances in neural information processing systems*, pages 2573–2581.
- 194 [8] Shah, N. B., Balakrishnan, S., Bradley, J., Parekh, A., Ramch, K., ran, and Wainwright, M. J.  
195 (2016). Estimation from pairwise comparisons: Sharp minimax bounds with topology dependence.  
196 *Journal of Machine Learning Research*, 17(58):1–47.
- 197 [9] Shalev-Shwartz, S. and Ben-David, S. (2014). *Understanding machine learning: From theory to*  
198 *algorithms*. Cambridge university press.
- 199 [10] Weinberger, K. Q. and Saul, L. K. (2009). Distance metric learning for large margin nearest  
200 neighbor classification. *Journal of Machine Learning Research*, 10(Feb):207–244.
- 201 [11] Zadeh, P., Hosseini, R., and Sra, S. (2016). Geometric mean metric learning. In *International*  
202 *conference on machine learning*, pages 2464–2471.
